# Supplementary material for: Scarlet Fever Epidemic in China Caused by Streptococcus pyogenes Serotype M12: Epidemiologic and Molecular Analysis
Source: PubMed Central journal article supplement (PMC5835554; doi:10.1016/j.ebiom.2018.01.010), 2018-01-11
Supplement: mmc5.pdf [file mmc5.pdf]

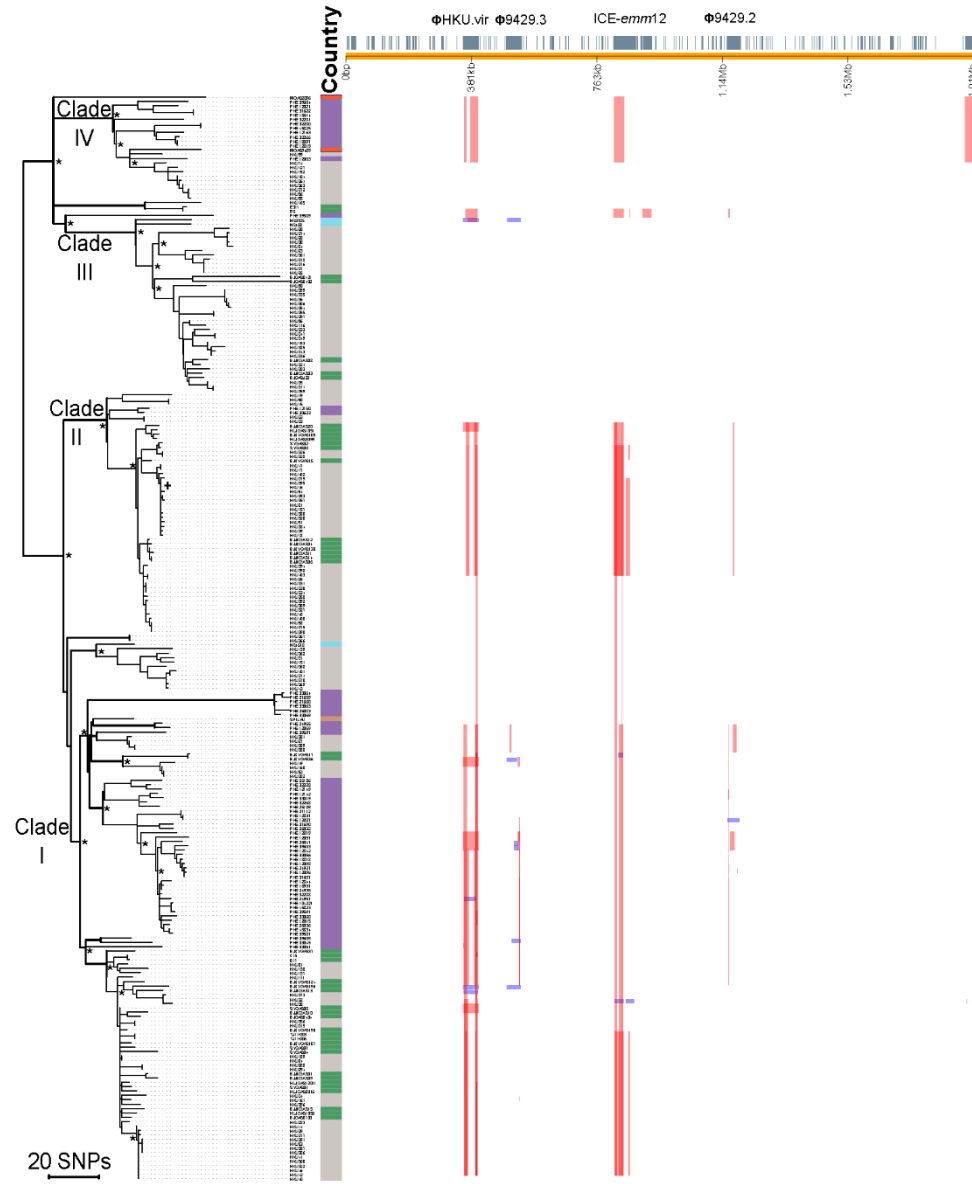

- Australia
- mainland China
- Hong Kong
- Lebanon
- United Kingdom
- USA
